# Supplementary material
Source: PubMed Central journal article supplement (PMC4136047)
Supplement: AAC.03145-14_zac008143153so1.pdf [file AAC.03145-14_zac008143153so1.pdf]

## Supplementary Figure 1

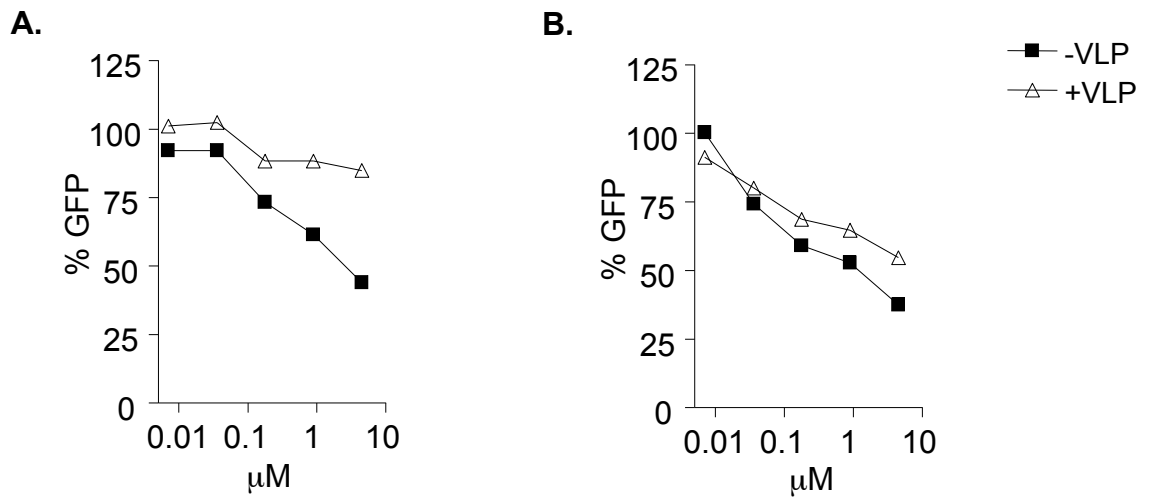

### Supplementary figure 1. Inter-donor differences in d4T antiviral potency in CD4+ T cells.

Dose response of the NRTI d4T in PHA activated CD4+ T lymphocytes, from 2 independent donors that were infected with or without Vpx. Inhibition of HIV infection was measured as the percentage of GFP+ cells relative to the no drug condition. In 2 out of 5 donors tested, antiviral potency of d4T was significantly affected after infection with NL4-3 virus carrying Vpx (NL4-3\*+Vpx, **panel A**), whereas a very modest effect was seen in the other 3 (**panel B**).

## Supplementary Figure 2

A.

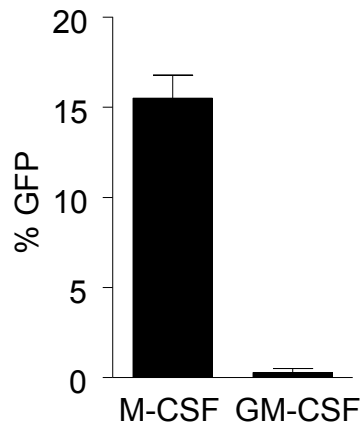

B.

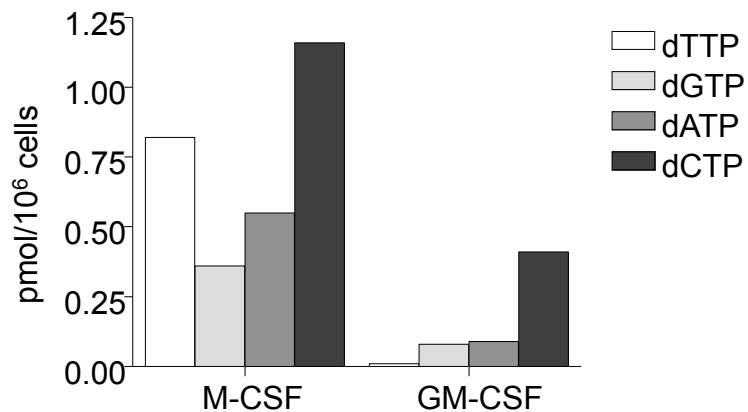

**Supplementary figure 2. M-CSF and GM-CSF differentiated macrophages show different susceptibility to HIV infection and different dNTP intracellular levels. (A) Susceptibility to HIV-1 infection.** MDM differentiated either with M-CSF or GM-CSF were infected with a VSV-pseudotyped HIV-1 GFP virus and replication assessed 2 days later by measuring GFP expression. **(B) Intracellular dNTP levels in M-CSF or GM-CSF differentiated MDM.** Intracellular dNTPs were extracted from differentiated MDM and dNTP content was determined using a polymerase-based method. Results from a representative donor are depicted.
